# Supplementary material
Source: MDPI journal article supplement (https://www.mdpi.com/search?q=marinedrugs-08-00373)
Supplement: s001 [file marinedrugs-08-00373-s001.pdf]

## Supplementary Information

**Table 1.** NMR spectroscopic data of valinomycin in CDCl<sub>3</sub> (<sup>1</sup>H: 500 MHz; <sup>13</sup>C: 125 MHz)

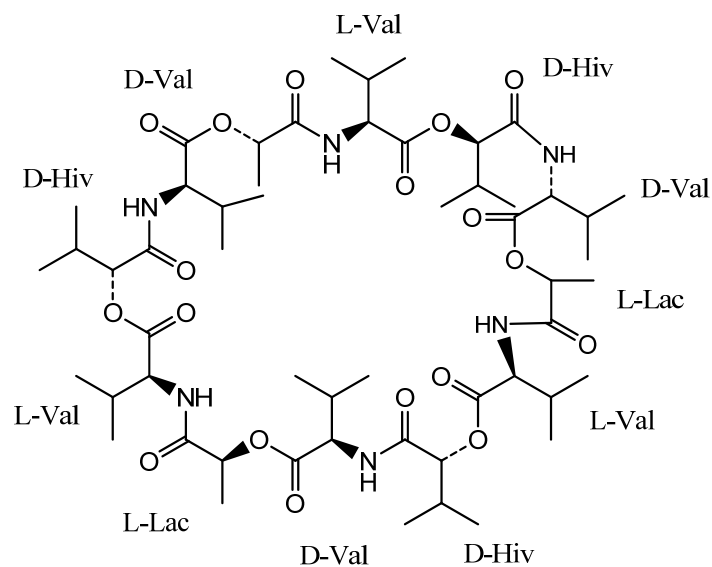

| Unit | Position           | $\delta_C$ | $\delta_H$ , mult | COSY   | HMBC   |
|------|--------------------|------------|-------------------|--------|--------|
| Hiv  | 1-CO               | 171.0      |                   |        | 2      |
|      | 2-CH               | 78.8       | 5.02, d           | 3      | 4, 5   |
|      | 3-CH               | 28.8       | 2.30, m           | 4, 5   | 4, 5   |
|      | 4-CH <sub>3</sub>  | 22.9       | 0.85, d           |        |        |
|      | 5-CH <sub>3</sub>  | 22.8       | 0.86, d           |        |        |
| Val  | 6-CO               | 170.4      |                   |        |        |
|      | 7-CH               | 59.1       | 4.10, t           | 8      | 9, 10  |
|      | 8-CH               | 28.6       | 2.25, m           | 9, 10  | 9, 10  |
|      | 9-CH <sub>3</sub>  | 19.5       | 0.96, d           |        |        |
|      | 10-CH <sub>3</sub> | 16.8       | 0.97, d           |        |        |
| Lac  | NH                 |            | 7.85, d           | 7      |        |
|      | 11-CO              | 172.6      |                   |        | 13     |
|      | 12-CH              | 70.4       | 5.30, q           | 13     | 13     |
|      | 13-CH <sub>3</sub> | 17.2       | 1.46, d           |        | 12     |
|      | 14-CO              | 171.9      |                   |        | 15     |
| Val  | 15-CH              | 60.5       | 4.00, t           | 16     | 17, 18 |
|      | 16-CH              | 27.4       | 2.04, m           | 17, 18 | 17, 18 |
|      | 17-CH <sub>3</sub> | 19.2       | 0.98, d           |        |        |
|      | 18-CH <sub>3</sub> | 18.4       | 0.99, d           |        |        |
|      | NH                 |            | 7.73, d           | 15     |        |

**Table 2.** NMR spectroscopic data of staurosporine in CD<sub>3</sub>OD (<sup>1</sup>H: 500 MHz; <sup>13</sup>C: 125 MHz).

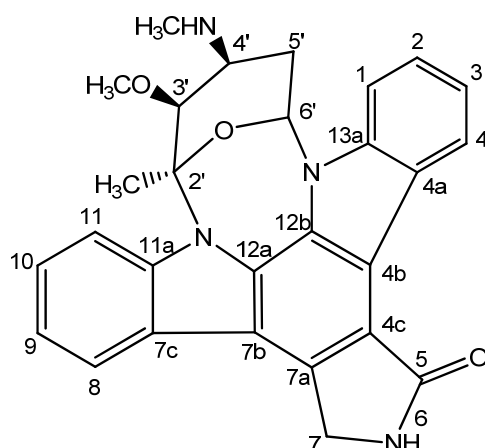

| Position | $\delta_C$ | $\delta_H$ , (H, mult)           | COSY         | HMBC                            |
|----------|------------|----------------------------------|--------------|---------------------------------|
| 1        | 109.3      | 7.16 (1H, d)                     | 2            | 4                               |
| 2        | 126.5      | 7.52 (1H, t)                     | 3            | 4                               |
| 3        | 126.6      | 7.41 (1H, t)                     | 2            | 1                               |
| 4        | 127.2      | 9.22 (1H, d)                     | 3            | 1, 4a, 12b, 13a                 |
| 4a       | 127.6      |                                  |              | 4                               |
| 4b       | 115.8      |                                  |              | 4                               |
| 4c       | 120.2      |                                  |              | 7A, 7B                          |
| 5        | 175.1      |                                  |              | 7A, 7B                          |
| 7        | 46.8       | 7A: 4.73 (1H)<br>7B: 4.44 (1H)   |              | 4b, 4c, 5, 7a                   |
| 7a       | 133.8      |                                  |              | 7A, 7B                          |
| 7b       | 115.8      |                                  |              |                                 |
| 7c       | 124.5      |                                  |              | 11                              |
| 8        | 122.7      | 7.81 (1H, d)                     | 9            | 9                               |
| 9        | 120.7      | 7.26 (1H, t)                     | 10           |                                 |
| 10       | 122.0      | 7.38 (1H, t)                     | 9            | 11                              |
| 11       | 113.4      | 7.96 (1H, d)                     | 10           | 2'-CH <sub>3</sub>              |
| 11a      | 139.4      |                                  |              | 11                              |
| 12a      | 131.4      |                                  |              | 7A, 7B                          |
| 12b      | 125.9      |                                  |              | 6'                              |
| 13a      | 137.7      |                                  |              | 4                               |
| 2'       | 94.2       |                                  |              | 2'-CH <sub>3</sub>              |
| 3'       | 81.4       | 4.21 (1H, s)                     | 4'           | 2', 2'-CH <sub>3</sub> , 3', 4' |
| 4'       | 55.9       | 3.90 (1H, dd)                    | 3', 5'A, 5'B | 3', 4'-NCH <sub>3</sub>         |
| 5'       | 28.8       | 5'A: 2.13 (1H)<br>5'B: 3.20 (1H) | 4', 6'       | 6'                              |

|                     |      |               |          |            |
|---------------------|------|---------------|----------|------------|
| 6'                  | 82.0 | 6.44 (1H, dd) | 5'A, 5'B |            |
| 2'-CH <sub>3</sub>  | 28.7 | 2.53 (3H, s)  |          | 2', 6', 11 |
| 3'-OCH <sub>3</sub> | 60.6 | 2.14 (3H, s)  |          | 3'         |
| 4'-NCH <sub>3</sub> | 31.3 | 2.78 (3H, s)  |          | 4'         |

**Table 3.** NMR spectroscopic data of butenolide in CD<sub>3</sub>OD (<sup>1</sup>H: 500 MHz; <sup>13</sup>C: 125 MHz).

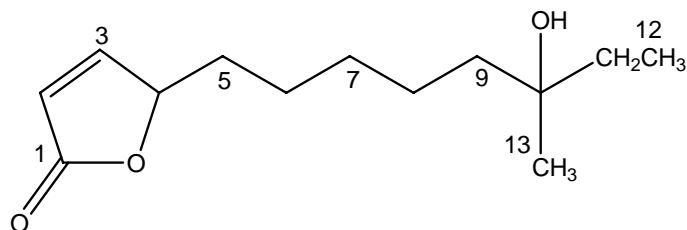

| Position | $\delta_C$ | $\delta_H$ , (H, mult)               | COSY  | HMBC       |
|----------|------------|--------------------------------------|-------|------------|
| 1        | 175.8      |                                      |       | 2          |
| 2        | 121.6      | 6.11 (1H, ddd)                       |       | 3          |
| 3        | 159.6      | 7.71 (1H, ddd)                       | 2, 4  | 2, 5A      |
| 4        | 85.6       | 5.13 (1H, m)                         | 2, 5A | 2, 3, 5A   |
| 5        | 34.9       | 5A: 1.81 (1H, m)<br>5B: 1.64 (1H, m) | 4, 6  |            |
| 6        | 25.8       | 1.45 (2H, m)                         | 5A    |            |
| 7        | 30.7       | 1.35 (2H, m)                         |       | 5A, 6      |
| 8        | 24.3       | 1.34 (2H, m)                         |       | 9          |
| 9        | 42.0       | 1.42 (2H, m)                         |       | 11         |
| 10       | 72.2       |                                      |       | 11, 12, 13 |
| 11       | 41.1       | 1.46 (2H, q)                         | 12    | 12, 13     |
| 12       | 8.5        | 0.89 (3H, t)                         |       | 11         |
| 13       | 25.9       | 1.11 (3H, s)                         |       | 11         |
